# Supplementary material
Source: PubMed Central journal article supplement (PMC7781062)

Supplementary Table ST3

*Data extraction of sensory-based approaches' studies*

Supplementary Table ST1

*Key-words and operators used for the review of articles in the databases*

|                     |                                                                                                                                                                                                                                                                                                                                                                                                                                                                                                                                                                                                                                                                                                                                                                                                                                                                                                                                                                                                                                                                                                                                              |
|---------------------|----------------------------------------------------------------------------------------------------------------------------------------------------------------------------------------------------------------------------------------------------------------------------------------------------------------------------------------------------------------------------------------------------------------------------------------------------------------------------------------------------------------------------------------------------------------------------------------------------------------------------------------------------------------------------------------------------------------------------------------------------------------------------------------------------------------------------------------------------------------------------------------------------------------------------------------------------------------------------------------------------------------------------------------------------------------------------------------------------------------------------------------------|
| <b>Population</b>   | child <u>OR</u> children <u>OR</u> kid* <u>OR</u> teen* <u>OR</u> youth* <u>OR</u> pediatric* <u>OR</u> peadiatric* <u>OR</u> adolescent* <u>OR</u> "school child*" <u>OR</u> schoolchild* <u>OR</u> juvenile* <u>OR</u> minor* <u>OR</u> "school boy*" <u>OR</u> schoolboy* <u>OR</u> schoolgirl* <u>OR</u> "school girl*" <u>OR</u> "school-going boy*" <u>OR</u> "school-going girl*" <u>OR</u> "school-going child*" <u>OR</u> "schoolgoing child*"                                                                                                                                                                                                                                                                                                                                                                                                                                                                                                                                                                                                                                                                                      |
| <b>AND</b>          |                                                                                                                                                                                                                                                                                                                                                                                                                                                                                                                                                                                                                                                                                                                                                                                                                                                                                                                                                                                                                                                                                                                                              |
| <b>Intervention</b> | "sensory-based intervention*" <u>OR</u> "sensory integration therap*" <u>OR</u> "sensory integration intervention*" <u>OR</u> "sensory integration approach*" <u>OR</u> "sensory integration" <u>OR</u> "sensorimotor integration" <u>OR</u> "sensorimotor approach*" <u>OR</u> "contemporary approach*" <u>OR</u> "contemporary practice*" <u>OR</u> "self-regulatory strateg*" <u>OR</u> "single-sensory strateg*" <u>OR</u> "sensory motor integration" <u>OR</u> "task-specific training program*" <u>OR</u> "impairment-oriented approach*" <u>OR</u> "impairment-oriented intervention*" <u>OR</u> "performance-oriented approach*" <u>OR</u> "direct skills teaching" <u>OR</u> "cognitive-based approach*" <u>OR</u> "performance-based intervention*" <u>OR</u> "perceptual motor program*" <u>OR</u> "sensory integration-based activit*" <u>OR</u> "performance focused intervention*" <u>OR</u> "sensory stimulation" <u>OR</u> "sensorimotor-type intervention*" <u>OR</u> "sensory integration techniques" <u>OR</u> "sensory integration-like approach*" <u>OR</u> "sensory stimulation technique*" <u>OR</u> "sensory diet*" |
| <b>AND</b>          |                                                                                                                                                                                                                                                                                                                                                                                                                                                                                                                                                                                                                                                                                                                                                                                                                                                                                                                                                                                                                                                                                                                                              |
| <b>Outcome</b>      | "school participation" <u>OR</u> education <u>OR</u> learning <u>OR</u> "school performance" <u>OR</u> "school progress*" <u>OR</u> "schooling" <u>OR</u> "child education" <u>OR</u> "schoolactivit*" <u>OR</u> "participation in class" <u>OR</u> "engagement in school" <u>OR</u> "engagement in school activit*"                                                                                                                                                                                                                                                                                                                                                                                                                                                                                                                                                                                                                                                                                                                                                                                                                         |

*Notes.* P = Population; I = Intervention; O = Outcome.

Supplementary Table ST3

*Data extraction of sensory-based approaches' studies*

Supplementary Table ST2

*Descriptors and operators used for the review of articles in databases*

| Base de données | Descripteurs |                                                                                                                                                                                                                                                                                                                                                  |
|-----------------|--------------|--------------------------------------------------------------------------------------------------------------------------------------------------------------------------------------------------------------------------------------------------------------------------------------------------------------------------------------------------|
| PubMed          | <b>P</b>     | ("Students"[Mesh]) <u>OR</u> "Child"[Mesh] "Sensation Disorders"[Mesh] <u>AND</u> "Somatosensory Disorders"[Mesh]                                                                                                                                                                                                                                |
|                 | <b>I</b>     | "Occupational Therapy"[Mesh] <u>OR</u> "Evidence-Based Practice"[Mesh]                                                                                                                                                                                                                                                                           |
|                 | <b>O</b>     | ("Learning"[Mesh]) <u>OR</u> "Education"[Mesh]                                                                                                                                                                                                                                                                                                   |
| CINHAL          | <b>P</b>     | (MH "Child") <u>OR</u> (MH "Adolescence") <u>OR</u> (MH "Minors (Legal)") <u>OR</u> (MH "Students, Middle School") <u>OR</u> (MH "Students, High School") <u>OR</u> (MH "Students, Elementary")                                                                                                                                                  |
|                 | <b>I</b>     | (MH "Occupational Therapy Practice, Evidence-Based") <u>OR</u> (MH "Sensory Stimulation") <u>OR</u> (MH "Sensory Motor Integration") <u>OR</u> (MH "Acoustic Stimulation") <u>OR</u> (MH "Physical Stimulation") <u>OR</u> (MH "Rehabilitation") <u>OR</u> (MH "Rehabilitation, Pediatric") <u>OR</u> (MH "Professional Practice, Theory-Based") |
|                 | <b>O</b>     | (MH "Learning") <u>OR</u> (MH "Education") <u>OR</u> (MH "Student Knowledge") <u>OR</u> (MH "Student Experiences") <u>OR</u> (MH "Student Attitudes") <u>OR</u> (MH "Behavioral Objectives") <u>OR</u> (MH "Student Performance Appraisal")                                                                                                      |
| EMBASE          | <b>P</b>     | 'child'/exp <u>OR</u> 'juvenile'/exp <u>OR</u> 'adolescent'/exp <u>OR</u> 'student'/exp <u>OR</u> 'middle school student'/exp <u>OR</u> 'high school student'/exp <u>OR</u> 'elementary student'/exp <u>OR</u> 'school child'/exp                                                                                                                |
|                 | <b>I</b>     | (major focus) : ('sensorimotor integration'/exp/mj <u>OR</u> 'sensory stimulation'/exp/mj                                                                                                                                                                                                                                                        |
|                 | <b>O</b>     | 'learning'/exp <u>OR</u> 'education'/exp <u>OR</u> 'academic achievement'/exp <u>OR</u> 'student attitude'/exp                                                                                                                                                                                                                                   |

*Notes.* P = Population; I = Intervention; O = Outcomes

Supplementary Table ST3

Data extraction of sensory-based approaches' studies

| Study                                    | Design                                                       | Objective                                                                    | Sample                                                                      | Intervention                                                                                                                                            | Outcomes                                                                                                                                                                                                                    | Results                                                                                                                                              | Quality                  |
|------------------------------------------|--------------------------------------------------------------|------------------------------------------------------------------------------|-----------------------------------------------------------------------------|---------------------------------------------------------------------------------------------------------------------------------------------------------|-----------------------------------------------------------------------------------------------------------------------------------------------------------------------------------------------------------------------------|------------------------------------------------------------------------------------------------------------------------------------------------------|--------------------------|
| <b>Sensory-based approaches</b>          |                                                              |                                                                              |                                                                             |                                                                                                                                                         |                                                                                                                                                                                                                             |                                                                                                                                                      |                          |
| <b>Lin, Lee, Chang &amp; Hong (2009)</b> | Quasi-experimental study<br><br>Two-periods crossover design | Impact of weighted vests on attention, impulse control, and on-task behavior | N = 110 (93 males)<br><b>Age:</b> 8.6 +/- 1.7 yo<br><b>Diagnosis :</b> ADHD | <b>Weighted vest condition (WVC):</b><br>- 10% of the child's weight<br><b>Unweighted vest condition (UVC):</b><br>- Less than 1% of the child's weight | <b>Attention to task</b><br>CPT-2:<br>Video camera for:<br>- Automatic vocalization<br>- On-seat behavior<br>- Eyes oriented toward the computer's screen<br>- Moves on the chair<br><b>Impulse control</b><br>Video camera | <b>Attention to task</b><br>WVC>UVC* for inattention; speed and most of the behaviors but not for vocalization.<br><b>Impulse control</b><br>No S.D. | <b>88% Letts</b><br>5-13 |

Supplementary Table ST3

Data extraction of sensory-based approaches' studies

| Study                                      | Design                                                                                 | Objective                                                                                 | Sample                                                                                                                     | Intervention                                                                                                                                                                                                                                                   | Outcomes                                                                                                                                    | Results                                                                                                                                                                                     | Quality                     |
|--------------------------------------------|----------------------------------------------------------------------------------------|-------------------------------------------------------------------------------------------|----------------------------------------------------------------------------------------------------------------------------|----------------------------------------------------------------------------------------------------------------------------------------------------------------------------------------------------------------------------------------------------------------|---------------------------------------------------------------------------------------------------------------------------------------------|---------------------------------------------------------------------------------------------------------------------------------------------------------------------------------------------|-----------------------------|
| Buckle, Franszen & Bester (2011)           | Quasi-experimental<br><br>Longitudinal quantitative design;<br>cross-over of treatment | Impact of weighted vest on in seat behavior, task completion speed and attention-to-task. | N = 30 (21 males)<br><br>Age: 6 to 9 yo<br><br>Diagnosis : ADHD and sensory modulation disorder                            | <b>2 groups:</b><br><b>A:</b> 1 <sup>st</sup> WVC and 2 <sup>nd</sup> control condition (CC)<br><b>B:</b> 1 <sup>st</sup> CC and 2 <sup>nd</sup> WVC<br><br><b>WVC:</b><br>- 10% of the child's weight<br>- 45min./day<br>Duration : 15 consecutive schooldays | Video camera:<br>-In seat behavior<br><br>Measured by the teacher:<br>-Task completion speed<br><br>Video camera:<br>-Attention-to-task     | <b>In seat behavior:</b><br>WVC>CC* (group B)<br><br><b>Task completion speed:</b> WVC<CC* (group A)<br><br><b>Attention-to-task:</b><br>WVC>CC*<br><br>No long term effects.               | <b>81% Letts</b><br>5-9-13  |
| Hodgetts, Magill-Evans & Misiaszek (2011a) | Quasi-experimental<br><br>Single-case study<br><br>A-B-A-C                             | Impact of weighted vest on in seat behaviors.                                             | N = 10 (8 males)<br><br>Age : 3 to 10 yo<br><br>Diagnosis : ASD with stereotyped behaviors and sensory modulation disorder | <b>A: Baseline and withdrawal conditions</b><br>- 1 w.<br>- No vest condition (NVC)<br><br><b>B: UVC</b><br>- 2 w.<br>- 20 min./day at the same time.<br><br><b>C: WVC</b><br>- 2 w.<br>- 20 min./day at the same time.                                        | Video camera<br><i>(percentage of intervals (15s) during which the behaviors are observed):</i><br>-Attention-to-task<br>-In seat behaviors | <b>In seat behavior:</b><br>WVC: No improvements<br><br><b>Attention-to-task:</b><br>WVC: Some children improved slightly, high rates of off-task behaviors. Efficacy observed for 1 child. | <b>80% Letts</b><br>5-10-11 |

Supplementary Table ST3

Data extraction of sensory-based approaches' studies

| Study                            | Design                                                                            | Objective                                                          | Sample                                                                                     | Intervention                                                                                                                                                                                             | Outcomes                                                                                  | Results                             | Quality                        |
|----------------------------------|-----------------------------------------------------------------------------------|--------------------------------------------------------------------|--------------------------------------------------------------------------------------------|----------------------------------------------------------------------------------------------------------------------------------------------------------------------------------------------------------|-------------------------------------------------------------------------------------------|-------------------------------------|--------------------------------|
| VandenBerg (2001)                | Quasi-experimental<br>Single-case study<br>A-B                                    | Impact of weighted vest on on-task behavior of children with ADHD. | N = 4 (2 males)<br><br>Age : 5 or 6 yo<br><br>Diagnosis: ADHD and sensory disorders        | - Fine motor task<br>- Weighted vest (5% of the child's weight)<br>- 15 min., 6 times for 15 days<br>- Children could wear the weighted vest even if no data were collected.                             | Observation in class (time measured with a stopwatch)<br>-On-task behaviors               | WVC>baseline* for all children      | <b>75% Letts</b><br>4-5-7-10   |
| Cox, Gast, Luscre & Ayres (2009) | Quasi-experimental<br>Single-case study<br>Alternating-treatments designs (A-B-C) | Impact of weighted vest on in-seat behaviors.                      | N = 3 (2 males)<br><br>Age: 5 to 9 yo<br><br>Diagnosis: ASD, sensory modulation disorders. | <b>A: Baseline</b><br>-NVC<br>-Duration: 4 to 5 days<br><br><b>Random alternating treatments A, B and C (5 sessions/phase)</b><br>-A: NVC<br>-B: UVC<br>-C: WVC (5% of the child's body weight)<br><br>- | Video camera (sections of 10s intervals coded (percentage of time)):<br>-In-seat behavior | No difference for the 3 conditions. | <b>71% Letts</b><br>5-10-11-13 |

Supplementary Table ST3

Data extraction of sensory-based approaches' studies

| Study                                      | Design                                                     | Objective                                         | Sample                                                                                                                     | Intervention                                                                                                                                                                                                                                                                                                        | Outcomes                                                                                                                  | Results                                                                                                                                  | Quality                         |
|--------------------------------------------|------------------------------------------------------------|---------------------------------------------------|----------------------------------------------------------------------------------------------------------------------------|---------------------------------------------------------------------------------------------------------------------------------------------------------------------------------------------------------------------------------------------------------------------------------------------------------------------|---------------------------------------------------------------------------------------------------------------------------|------------------------------------------------------------------------------------------------------------------------------------------|---------------------------------|
| Hodgetts, Magill-Evans & Misiaszek (2011b) | Quasi-experimental<br><br>Single case study<br><br>A-B-C-A | Impact of weighted vest on stereotyped behaviors. | N = 6 (5 males)<br><br>Age: 4 to 10 yo<br><br>Diagnostics : ASD with stereotyped behaviors and sensory modulation disorder | <b>A: Baseline and withdrawal</b><br>- Duration: 1 w.<br>- NVC<br><br><b>B: UVC</b><br>- Duration: 2 w.<br>- 20 min./day, at the same moment.<br><br><b>C: WVC</b><br>- Duration: 2 w.<br>- 20 min./day<br>5-10% of the child's weight                                                                              | Video camera<br><i>(percentage of intervals (15s) during which the behaviors are observed):</i><br>-Stereotyped behaviors | <b>Stereotyped behaviors:</b><br><u>Motor:</u><br>WVC: No reduction<br><u>Verbal:</u><br>WVC: Possible reduction for 1 child.            | <b>71% Letts</b><br>5-10-11-13  |
| Collins & Dworkin (2011)                   | Quasi-experimental<br><br>Single-case study<br><br>A-B-A   | Impact of weighted vest on attention-to-task.     | N = 11 (8 males)<br><br>Age: 7 years to 10 yo<br><br>Diagnosis: Attention difficulties                                     | <b>Experimental group</b><br>-3 to 6 w.<br>-Phases A and B<br><br><b>A: UVC</b><br>- Same vest, but weights replaced by polystyrene foam<br>- 3 w. before and after phase B.<br><br><b>B: WVC</b><br>- OTvest<br>- Weight not mentioned<br>- 3 sessions<br><br><b>Control group</b><br>-Children never wore a vest. | Video camera (sections of 15s intervals coded (percentage of time)):<br>-Attention-to-task                                | No S.D. between the groups.<br><br>WVC: Reduction of attention-to-task for some children (experimental group n=4 and control group n=2). | <b>69% Letts</b><br>5-7-9-10-13 |

Supplementary Table ST3

Data extraction of sensory-based approaches' studies

| Study                                         | Design                                                                           | Objective                                                                                    | Sample                                                                                                | Intervention                                                                                                                                                                                                                                       | Outcomes                                                                                                                                                     | Results                                                                                                                                                                                                                       | Quality                            |
|-----------------------------------------------|----------------------------------------------------------------------------------|----------------------------------------------------------------------------------------------|-------------------------------------------------------------------------------------------------------|----------------------------------------------------------------------------------------------------------------------------------------------------------------------------------------------------------------------------------------------------|--------------------------------------------------------------------------------------------------------------------------------------------------------------|-------------------------------------------------------------------------------------------------------------------------------------------------------------------------------------------------------------------------------|------------------------------------|
| Reichow, Barton, Sewell, Good & Wolery (2010) | Quasi-experimental<br>Single-case study<br>Alternating-treatments design (A-B-C) | Impact of weighted vest on school engagement, stereotypes behaviors and behavioral problems. | N = 3 males<br>Age : 4 and 5 yo<br>Diagnosis: ASD, developmental delays, sensory modulation disorder. | <b>Random condition (Phase A, B or C)</b><br><br><b>A: NVC</b><br>-2 sessions<br><br><b>B: WVC</b><br>-2 sessions<br>-5% of the child's weight<br><br><b>C: UVC</b><br>- 2 sessions<br>-                                                           | Video camera (percentage of intervals (15s) during which the behaviors are observed):<br>-School engagement<br>-Stereotyped behaviors<br>-Behavioral problem | <b>School engagement:</b><br>WVC: No difference with the UVC and NVC for the 3 children<br><br><b>Stereotyped behaviors:</b><br>WVC: Reduction for 1 child<br><br><b>Behavioral problems:</b><br>WVC : Increase for one child | <b>67% Letts</b><br>5-7-10-12-13   |
| Deris, Hagelman, Schilling & DiCarlo (2014)   | Quasi-experimental<br>Single-case study<br>Alternating-treatments design         | Impact of a weighted vest on attention-to-task and stereotyped behaviors.                    | N = 1 male<br>Age: 4 yo<br>Diagnosis : ASD, strabismus                                                | <b>Baseline</b><br>- Observations during the morning circle time<br>- 10 min. intervals<br><br><b>Treatment Phase</b><br>-WVC: 10% of the child's weight<br>-Deep pressure vest condition<br>-30 minutes before the morning circle time<br><br>NVC | Video camera (frequency of the behaviors)<br>-Attention-to-task<br>-Stereotyped behaviors (autostimulation)                                                  | <b>Attention to task:</b><br>WVC and deep pressure vest conditions: Small improvements compared to baseline.<br><br><b>Stereotyped behaviors:</b> No difference between the phases                                            | <b>57% Letts</b><br>4-5-8-10-11-13 |

Supplementary Table ST3

Data extraction of sensory-based approaches' studies

| Study                                 | Design                                                     | Objective                                                                                                                                                                                                  | Sample                                                                                                                                                                                                                                         | Intervention                                                                                                                                                                                                                                                                                                                                                 | Outcomes                                                                                                                                                                                                                                            | Results                                                                                                                                                                 | Quality                              |
|---------------------------------------|------------------------------------------------------------|------------------------------------------------------------------------------------------------------------------------------------------------------------------------------------------------------------|------------------------------------------------------------------------------------------------------------------------------------------------------------------------------------------------------------------------------------------------|--------------------------------------------------------------------------------------------------------------------------------------------------------------------------------------------------------------------------------------------------------------------------------------------------------------------------------------------------------------|-----------------------------------------------------------------------------------------------------------------------------------------------------------------------------------------------------------------------------------------------------|-------------------------------------------------------------------------------------------------------------------------------------------------------------------------|--------------------------------------|
| Myles & al. (2004)                    | Quasi-experimental<br><br>Single-case study<br><br>A-B-A-B | <b>Case 1:</b> Impact of a weighted vest on attention-to-task of a child with ASD.<br><br><b>Case 3:</b> Impact of a weighted vest on attention-to-task and autostimulation behaviors of a child with ASD. | <b>Case 1:</b><br>N = 1 female<br><b>Age:</b> 5 yo<br><b>Diagnosis:</b> ASD<br><br><b>Case 3:</b><br>N = 1 male<br><b>Age:</b> 4 yo<br><b>Diagnosis:</b> ASD<br><br>Note: Exclusion of the 2 <sup>nd</sup> child (not aged between 4 to 17 yo) | <b>Case 1:</b><br><b>A: NVC (baseline and withdrawal)</b><br><br><b>B: WVC</b><br>-10% of the child's weight.<br><br><b>A and B:</b> Support to stay in-seat, pictograms, chewing necklace.<br><br><b>Case 3:</b><br><b>A: NVC</b><br><br><b>B: WVC</b><br>-5% of the child's weight<br>-30 minutes before the activities and withdrawn before they started. | Video camera:<br><br><b>Case 1:</b><br>Time of the behavior:<br>-Attention-to-task<br><br><b>Case 3:</b><br>Time of the behavior:<br>-Attention-to-task<br>Frequency of the behavior:<br>-Autostimulation (sensory seeking behavior: deep pressure) | <b>Case 1:</b><br>WVC: Reduction of the child's attention to task compared to NVC.<br><br><b>Case 3:</b><br>WVC: S.D. of autostimulation behavior compared to baseline. | <b>53% Letts</b><br>4-5-7-8-10-12-13 |
| Reichow, Barton, Good & Wolery (2009) | Quasi-experimental<br><br>Single-case study<br><br>A-B-A   | Impact of a weighted vest on school engagement and behavioral problems.                                                                                                                                    | N = 1 male<br><b>Age:</b> 4 yo<br><b>Diagnosis:</b> ASD and developmental delays                                                                                                                                                               | <b>Beginning of the study:</b><br>-Child was wearing a weighted vest since 2 years (without a specific protocol of use)<br><br><b>A: NVC (baseline and withdrawal)</b><br><br><b>B: WVC</b><br>-Weight equally distributed over the body<br>-10 to 15 min. during school table activities                                                                    | Video Camera (percentage of intervals (10s) during which the behaviors are observed):<br>-School engagement<br>-Behavioral problems                                                                                                                 | <b>School engagement:</b><br>WVC: No systematic effect on engagement compared to NVC.<br><br><b>Behavioral problems:</b><br>WVC: Increase compared to baseline.         | <b>50% Letts</b><br>4-5-7-8-10-11-13 |



Supplementary Table ST3

Data extraction of sensory-based approaches' studies

| Study                 | Design                                                 | Objective                                                           | Sample                                                                                                                         | Intervention                                                                                                                                                                                                     | Outcomes                                                                                                                                                                        | Results                                                                                                                                                                                          | Quality                    |
|-----------------------|--------------------------------------------------------|---------------------------------------------------------------------|--------------------------------------------------------------------------------------------------------------------------------|------------------------------------------------------------------------------------------------------------------------------------------------------------------------------------------------------------------|---------------------------------------------------------------------------------------------------------------------------------------------------------------------------------|--------------------------------------------------------------------------------------------------------------------------------------------------------------------------------------------------|----------------------------|
| Fedewa & Erwin (2011) | Quasi-experimental<br><br>Single-case study<br><br>A-B | Impact of therapy balls on in-seat and school engagement behaviors. | N = 8 (6 males)<br><br><b>Average age:</b> 9 yo<br><br><b>Diagnosis:</b> 5 children with ADHD and 3 without a formal diagnosis | <b>A: Baseline</b><br>- Duration: 2 w.<br><br><b>B: Therapy balls condition (TBC)</b><br>- Duration: 12 w.<br>- 1 group<br>- 2 days before data collection therapy balls were used to reduce the novelty effect. | Observation in class (weekly percentage of the time of the behavior):<br>-In-seat behavior<br>-On task behavior<br><br>ADHDT:<br>-Hyperactivity<br>-Impulsivity<br>-Inattention | <b>TBC:</b><br>-Increase of in-seat behavior: 45% (A) to 94% (B)<br>-Increase of on-task behavior: 10% (A) to 80% (B)<br><br><b>ADHDT:</b><br>S.D*** between baseline and 2 w. post-intervention | <b>80% Letts</b><br>5-9-10 |

Supplementary Table ST4

Data extraction of sensorimotor approaches' studies

| Study                                                                 | Design                                                              | Objective                                                                                                                      | Sample                                                                                                    | Intervention                                                                                                                                                                                                                                                                     | Outcomes                                                                                                                           | Results                                                                                                                                                                                                                                                        | Quality                        |
|-----------------------------------------------------------------------|---------------------------------------------------------------------|--------------------------------------------------------------------------------------------------------------------------------|-----------------------------------------------------------------------------------------------------------|----------------------------------------------------------------------------------------------------------------------------------------------------------------------------------------------------------------------------------------------------------------------------------|------------------------------------------------------------------------------------------------------------------------------------|----------------------------------------------------------------------------------------------------------------------------------------------------------------------------------------------------------------------------------------------------------------|--------------------------------|
| Matin Sadr, Haghgoo, Samadi, Rassafiani, Bakhshi & Hassanabadi (2017) | Quasi-experimental<br><br>Single-case study<br><br>A-B-A-C          | Comparison of the impact of standard chair, therapy balls and air cushions on school behaviors.                                | N = 15 (10 males)<br><br>Age: 7 to 10 yo<br><br>Diagnosis: ASD                                            | <b>A: Standard chair condition (SCC)</b><br>- 2 times 2 w.<br><br><b>B: TBC or air cushion condition (ACC)</b><br>- Duration: 2 w.<br>- Air cushions (n=8)<br>- Therapy balls (n=7)<br><b>C: TBC or ACC</b><br>- Duration: 2 w.<br>- Air cushions (n=7)<br>- Therapy balls (n=8) | Video camera:<br>- In-seat behavior<br>- On-task behavior                                                                          | <b>In-seat behavior:</b><br>- ACC: Improvement for some children.<br>- TBC: Improvement for more than 50% of children<br><br><b>On-task behavior:</b><br>- ACC: Improvement for 3 children and reduction for 8.<br>- TBC: Improvement for 8 children (no S.D.) | <b>80% Letts</b><br>5-10-13    |
| Oriel, George, Peckus & Semon (2011)                                  | Quasi-experimental<br><br>Single-case study<br><br>Crossover design | Impact of aerobic exercises before school activities on correct academic responses, stereotyped behaviors and task engagement. | N = 9 (7 males)<br><br>Age: 3 to 6 yo<br><br>Diagnosis: ASD, intellectual disability, developmental delay | <b>A: No intervention condition</b><br>- Duration: 3w.<br><br><b>B: Aerobic exercises condition (AEC)</b><br>- Duration: 3 w.<br>- 15 minutes of running before the school activity.                                                                                             | Observation in class (frequency of the behaviors):<br>- Correct academic responses<br>- Stereotyped behaviors<br>- Task engagement | <b>Correct academic responses:</b><br>AEC > No intervention condition<br><br><b>Stereotyped behaviors:</b><br>No S.D. between the 2 conditions<br><br><b>Task engagement:</b><br>No S.D. between the 2 conditions                                              | <b>75 % Letts</b><br>5-7-10-14 |

Supplementary Table ST4

Data extraction of sensorimotor approaches' studies

| Study                                                   | Design                                                     | Objective                                                                                   | Sample                                                                                                   | Intervention                                                                                                                                                                                                                     | Outcomes                                                                                                                                                                                     | Results                                                                                                                                                             | Quality                          |
|---------------------------------------------------------|------------------------------------------------------------|---------------------------------------------------------------------------------------------|----------------------------------------------------------------------------------------------------------|----------------------------------------------------------------------------------------------------------------------------------------------------------------------------------------------------------------------------------|----------------------------------------------------------------------------------------------------------------------------------------------------------------------------------------------|---------------------------------------------------------------------------------------------------------------------------------------------------------------------|----------------------------------|
| Murdock, Dantzer, Walker & Wood (2014)                  | Experimental<br><br>Randomized clinical trial              | Impact of a platform swing on on-task, in-seat and stereotyped behaviors.                   | N = 30 (26 males)<br><br>Age: 2 to 6 yo<br><br>Diagnosis: ASD<br>n exp. group = 15<br>n ctrl. group = 15 | <b>Experimental group:</b><br>-5 mins of schoolwork, 5 mins of platform swing in a linear slow motion, 5 min. of school work<br><br><b>Control group:</b><br>- 5 min. of schoolwork, 5 min. of television, 5 min. of school work | Video camera (partial interval time sampling):<br>-On-task behavior<br>-In-seat behavior<br>-Stereotyped behaviors                                                                           | <b>All dependent variables:</b><br>No S.D. between the 2 groups                                                                                                     | <b>73% PEDro</b><br>5-6-11       |
| Matin Sadr, Haghgoo, Samadi, Rassafiani & Bakshi (2015) | Quasi-experimental<br><br>Single-case study<br><br>A-B-A-C | Impact of therapy balls, air cushions and standard chairs on on-task and in-seat behaviors. | N= 4 (sex not specified)<br>Age: 7 to 10 yo<br><br>Diagnosis: ASD                                        | Sitting devices implemented 2 days before baseline<br><b>A: SCC</b><br><b>B: TBC</b><br><b>C: ACC</b><br>Duration of each phases : 1 w.                                                                                          | Video camera (percentage of time of the behaviors):<br>-On-task behavior<br>-In-seat behavior                                                                                                | <b>For the 2 variables:</b><br><b>TBC:</b> Variability of the results according to the child, but better than SCC.<br><br><b>ACC:</b> Improvement for all children. | <b>71% Letts</b><br>5-10-11-13   |
| Schilling, Washington, Billingsley & Deitz (2003)       | Quasi-experimental<br><br>Single-case study<br><br>A-B-A-B | Impact of therapy balls on in-seat behavior and writing legibility.                         | N = 3 (2 males)<br><br>Age: 9 yo<br><br>Diagnosis : ADHD, behavioral problems (n=2)                      | <b>A: Baseline and withdrawal (SCC)</b><br><br><b>B: TBC</b><br><br><b>A and B:</b><br>-During a writing task<br>-Observation for 40 mins.                                                                                       | Video Camera (percentage of intervals (10s) during which the behaviors are observed):<br>-In-seat behavior<br>Comparison to the class mean with a window card method:<br>-Writing legibility | <b>2 variables:</b><br>TBC: Improvement for all children                                                                                                            | <b>64% Letts</b><br>5-7-10-11-13 |

Supplementary Table ST4

Data extraction of sensorimotor approaches' studies

| Study                       | Design                                                                                              | Objective                                                                   | Sample                                                                | Intervention                                                                                                                                                                                                                                                                       | Outcomes                                                                                                                                 | Results                                                       | Quality                          |
|-----------------------------|-----------------------------------------------------------------------------------------------------|-----------------------------------------------------------------------------|-----------------------------------------------------------------------|------------------------------------------------------------------------------------------------------------------------------------------------------------------------------------------------------------------------------------------------------------------------------------|------------------------------------------------------------------------------------------------------------------------------------------|---------------------------------------------------------------|----------------------------------|
| Van Rie & Heflin (2009)     | Quasi-experimental<br><br>Single-case study<br><br>Alternating treatment design                     | Impact of sensorial activities on production of correct academic responses. | N = 4 males<br><br><b>Age:</b> 6 to 7 yo<br><br><b>Diagnosis:</b> ASD | <b>Experimental intervention:</b><br>-Swinging in a slow linear motion or rapid bouncing on a therapy ball.<br>-5 min. before academic instructions<br><br><b>Control intervention:</b><br>-Teacher read a story book chosen by the child<br>-5 min. before academic instructions. | Number of correct responses / number of responses opportunities (%):<br><br>-Correct responses to academic instruction                   | Variability of the results according to the child             | <b>64% Letts</b><br>5-7-10-11-13 |
| Schilling & Schwartz (2004) | Quasi-experimental<br><br>Single-case study<br><br>A-B-A-B (for 3 children),<br>B-A-B (for 1 child) | Impact of therapy balls on in-seat behavior and task engagement.            | N =4 males<br><br><b>Age:</b> 3 to 4 yo<br><br><b>Diagnosis :</b> ASD | <b>A: baseline and withdrawal (standard seating device)</b><br><br><b>B: TBC</b><br>-Minimum 2 schoolw.<br>-At school: Activity and moment of use individualized for each child.                                                                                                   | Video Camera<br><i>(percentage of intervals (10s) during which the behaviors are observed):</i><br>-In-seat behavior<br>-Task engagement | <b>2 variables:</b><br>TBC: Improvement for all the children. | <b>64% Letts</b><br>5-7-10-11-13 |

Supplementary Table ST4

Data extraction of sensorimotor approaches' studies

| Study                                     | Design                                                                          | Objective                                                                                             | Sample                                                                         | Intervention                                                                                                                                                                                                                                                                                                                                                                                                            | Outcomes                                                                                                                                           | Results                                                                      | Quality                             |
|-------------------------------------------|---------------------------------------------------------------------------------|-------------------------------------------------------------------------------------------------------|--------------------------------------------------------------------------------|-------------------------------------------------------------------------------------------------------------------------------------------------------------------------------------------------------------------------------------------------------------------------------------------------------------------------------------------------------------------------------------------------------------------------|----------------------------------------------------------------------------------------------------------------------------------------------------|------------------------------------------------------------------------------|-------------------------------------|
| Neely, Rispoli, Gerow et Ninci (2015)     | Quasi-experimental<br><br>Single-case study<br><br>Alternating treatment design | Impact of physical exercise before academic instruction on task engagement and stereotyped behaviors. | N = 2 (1 male)<br><br>Age: 7 and 8 yo<br><br>Diagnosis: ASD                    | 1 time per day, 3 to 4 times per w. during 10 to 12 w.<br><br><b>A: No intervention condition</b><br>-No antecedent exercise<br><br><b>B: Brief duration of antecedent exercise</b><br>- 20% of the time to satiation<br>- Jumping on a trampoline<br><br><b>C: Antecedent exercise until behavioral indication of satiation</b><br>-After 3 hypothesized behavioral indicator of satiation<br>-Jumping on a trampoline | Video Camera<br><i>(percentage of intervals (10s) during which the behaviors are observed):</i><br><br>-Task engagements<br>-Stereotyped behaviors | <b>Task engagement:</b><br>C>B>A<br><br><b>Stereotyped behaviors:</b><br>C<A | <b>64 % Letts</b><br>5-7-10-11-13   |
| Nicholson, Kehle, Bray & Van Heest (2011) | Quasi-experimental<br><br>Single-case study<br><br>Multiple baseline design     | Impact of physical exercise on task engagement.                                                       | N = 4 males<br>Age: 9 yo<br><br>Diagnosis : ASD (higher cognitive functioning) | <b>Intervention:</b><br>- Jogging for 12 min., 5 min. of walking and stretching.<br>- Support during jogging when needed.                                                                                                                                                                                                                                                                                               | Video camera<br><i>(percentage of total task engagement time):</i><br>Task engagement                                                              | Effect size demonstrated that physical exercise improved task engagement.    | <b>57 % Letts</b><br>4-5-7-10-11-13 |

Supplementary Table ST4

Data extraction of sensorimotor approaches' studies

| Study                                                | Design                                                   | Objective                                                        | Sample                                                                                                                                                                                                                  | Intervention                                                                                                                                                                                                                                                                                     | Outcomes                                                                                                                                                          | Results                                                                                                                                                                                                   | Quality                             |
|------------------------------------------------------|----------------------------------------------------------|------------------------------------------------------------------|-------------------------------------------------------------------------------------------------------------------------------------------------------------------------------------------------------------------------|--------------------------------------------------------------------------------------------------------------------------------------------------------------------------------------------------------------------------------------------------------------------------------------------------|-------------------------------------------------------------------------------------------------------------------------------------------------------------------|-----------------------------------------------------------------------------------------------------------------------------------------------------------------------------------------------------------|-------------------------------------|
| Bagatell, Mirigliani, Patterson, Reyes & Test (2010) | Quasi-experimental<br><br>Single-case study<br><br>A-B-C | Impact of therapy balls on in-seat behavior and task engagement. | N=6 males<br><br><b>Age:</b> kindergarten and 1 <sup>st</sup> grade<br><br><b>Diagnosis:</b> ASD                                                                                                                        | <b>A: Baseline</b><br>-Duration: 5 days<br>-During circle time<br>-SCC<br><br><b>B: TBC</b><br>-Duration: 9 days<br>-Teacher also sat on a therapy ball<br><br><b>C: Choice condition</b><br>-Duration: 5 days<br>-Each child chose each day his sitting device (standard chair or therapy ball) | Video camera ( <i>total number of seconds of the behavior</i> ):<br>-In seat behavior<br>-Task engagement                                                         | <b>2 variables:</b><br>-Variability of the results according to the child and its sensory characteristics.<br>*Therapy balls may be effective for vestibular and proprioceptive sensory seeking children. | <b>57 % Letts</b><br>4-5-7-10-11-13 |
| Pfeiffer, Henry, Miller & Witherell (2008)           | Experimental<br><br>Randomized clinical trial            | Impact of Disc'O' Sit cushion on attention to task.              | N = 63 (sex not specified)<br><br><b>Age:</b> 7 to 9 yo<br><br><b>Diagnosis:</b> Attention difficulties (score at the BRIEF: higher than 15) without inner ear difficulties.<br>n exp. group = 31<br>n ctrl. group = 32 | <b>Experimental group:</b><br>-Duration: 2 w.<br>- Disc'O' Sit cushion<br><br><b>Control group:</b><br>-Duration: 2 w.<br>-Standard chair                                                                                                                                                        | BRIEF administered by the teacher or its assistant:<br><b>Attention to task:</b><br>-Self-control<br>-Problem solving<br>-Behavioral regulation<br>-metacognition | <b>Attention to task:</b><br>Experimental group > control group                                                                                                                                           | <b>55% PEDro</b><br>3-5-6-7-9       |

Supplementary Table ST4

Data extraction of sensorimotor approaches' studies

| Study                | Design                                                       | Objective                                               | Sample                                                                                                                                                          | Intervention                                                                                                                                                                                                                                                                             | Outcomes                                                                                                                                  | Results                                                                                                  | Quality                                |
|----------------------|--------------------------------------------------------------|---------------------------------------------------------|-----------------------------------------------------------------------------------------------------------------------------------------------------------------|------------------------------------------------------------------------------------------------------------------------------------------------------------------------------------------------------------------------------------------------------------------------------------------|-------------------------------------------------------------------------------------------------------------------------------------------|----------------------------------------------------------------------------------------------------------|----------------------------------------|
| Umeda & Deitz (2011) | Quasi-experimental<br><br>Single-case study<br><br>A-B-A-B-C | Impact of air cushion on in-seat and on-task behaviors. | N = 2 males<br><br>Age: 5 and 6 yo<br><br>Diagnosis: ASD, delays in cognitive and language development, disruptive self-stimulatory behaviors, low muscle tone. | <b>A: Baseline and withdrawal</b><br>-Duration: 2 to 3 w.<br>-SCC during math classes<br><br><b>B: ACC</b><br>-Duration: 2 to 3 w.<br>-During math classes<br><br><b>C: Choice condition</b><br>-1.5 w.<br>-Each child chose each day his sitting device (standard chair or air cushion) | Video Camera<br><i>(percentage of intervals (10s) during which the behaviors are observed):</i><br>-In-seat behavior<br>-On-task behavior | <b>2 variables:</b><br>No S.D. between the ACC and SCC (variability of the results during all the study) | <b>50 % Letts</b><br>4-5-7-10-11-13-16 |

Supplementary Table ST4  
*Data extraction of sensorimotor approaches' studies*

| Design                                       | Objective                                                                                                                                   | Sample                                                                                                                                                                                                       | Intervention                                                                                                                                                                                                                                                                                             | Outcomes                                                                                                                                                                                                                                                                                                                           | Results                                                                                                                                                                                                                                                                                                                                                | Qu                      |
|----------------------------------------------|---------------------------------------------------------------------------------------------------------------------------------------------|--------------------------------------------------------------------------------------------------------------------------------------------------------------------------------------------------------------|----------------------------------------------------------------------------------------------------------------------------------------------------------------------------------------------------------------------------------------------------------------------------------------------------------|------------------------------------------------------------------------------------------------------------------------------------------------------------------------------------------------------------------------------------------------------------------------------------------------------------------------------------|--------------------------------------------------------------------------------------------------------------------------------------------------------------------------------------------------------------------------------------------------------------------------------------------------------------------------------------------------------|-------------------------|
| Experimental<br>Randomized<br>clinical trial | Impact of sensory integration therapy on executive functions.                                                                               | N = 20 males<br><b>Average age:</b><br>8 yo<br><b>Diagnosis:</b><br>ADHD<br>n <sub>exp. group</sub> = 10<br>n <sub>ctrl. group</sub> = 10                                                                    | 12 sessions (2 per w.)<br><b>Experimental group:</b><br>-Activities that promote balance, space awareness, motor planning and coordination, visual and auditory attention, auditory and visual memory, and eye-hand coordination.<br>-Tactile activities<br><br><b>Control group:</b><br>- Not specified | Conner's Behavior Rating Scale Parents:<br>-Executive functions                                                                                                                                                                                                                                                                    | S.D.** between the experimental and control group (sensory integration therapy increased executive functions).                                                                                                                                                                                                                                         | <b>64% P</b><br>3-5-6-7 |
| Experimental<br>Randomized<br>clinical trial | Impact of sensory integration therapy and perceptual-motor training on sensorimotor skills and language cognitive and academic performance. | N = 30 (21 males)<br><br><b>Age:</b> 6 to 8 yo<br><br><b>Diagnosis:</b><br>Learning disability, sensory disorders<br><br>n <sub>group 1</sub> = 10<br>n <sub>group 2</sub> = 10<br>n <sub>group 3</sub> = 10 | <b>Group 1:</b><br>-Sensory integration therapy<br>-24 sessions of 1h. (1 per w.)<br><br><b>Group 2:</b><br>-Perceptual-motor training<br><br><b>Group 3:</b><br>-Control group: no treatment                                                                                                            | BOT-2:<br>-Fine and global motor skills (sensorimotor skills)<br><br>VMI and SCSIT:<br>-Perceptual-motor skills (sensorimotor skills)<br><br>WRAT and WISC-R/<br>WPPSI:<br>-Cognitive, academic and language performance<br><br>TOLD:<br>-Language performance<br><br>Clinical observations:<br>-Praxis<br>-Vestibular functioning | <b>Global motor skills:</b><br>-BOT-2 Gross Motor measure: S.I. compared to group 3.<br>S.I. of group 1 for the strength measure compared to groups 2 and 3.<br><br><b>Perceptual-motor skills:</b><br>-SCSIT (Motor Accuracy-Right measure): S.I. of group 1 compared to groups 2 and 3.<br><br><b>Other variables:</b><br>No significant differences | <b>64% P</b><br>3-5-6-9 |



Supplementary Table ST4

Data extraction of sensorimotor approaches' studies

| Design                                           | Objective                                                                                                            | Sample                                                                                                                                                                                                   | Intervention                                                                                                                                                                                                                | Outcomes                                                                                                                                                                                                                                                                                                                                                                                          | Results                                                                                                                                                                                                                                                                                                                                                                                                                                                                                                                                       | Qu                      |
|--------------------------------------------------|----------------------------------------------------------------------------------------------------------------------|----------------------------------------------------------------------------------------------------------------------------------------------------------------------------------------------------------|-----------------------------------------------------------------------------------------------------------------------------------------------------------------------------------------------------------------------------|---------------------------------------------------------------------------------------------------------------------------------------------------------------------------------------------------------------------------------------------------------------------------------------------------------------------------------------------------------------------------------------------------|-----------------------------------------------------------------------------------------------------------------------------------------------------------------------------------------------------------------------------------------------------------------------------------------------------------------------------------------------------------------------------------------------------------------------------------------------------------------------------------------------------------------------------------------------|-------------------------|
| Experimental<br><br>Randomized<br>clinical trial | Impact of sensory integration therapy and perceptual motor training on sensorimotor skills and academic performance. | N = 103 (sex not specified)<br><br>Age: 4 to 9 yo<br><br>Diagnosis: Learning disability and sensory disorders<br><br>n <sub>group 1</sub> = 35<br>n <sub>group 2</sub> = 35<br>n <sub>group 3</sub> = 33 | <b>Group 1:</b><br>-Perceptual-motor training<br>-3h. per w. (total of 72 h.)<br><br><b>Group 2:</b><br>-Sensory integration therapy<br>-3h. per w. (total of 72 h.)<br><br><b>Group 3:</b><br>-Control group: no treatment | BOT-2:<br>-Global motor skills<br><br>VMI and SCSIT:<br>-Visual perception<br><br>Clinical observations:<br>-Motor planning<br>-Vestibular functioning<br><br>Zaner-Bloser Printing Evaluation Scale and Basic School Scale<br>Inventory :<br>-Handwriting readiness<br>-Copying quality<br><br>CPT:<br>-Attentional skills<br><br>WRAT:<br>-Academic, language and cognitive skills.<br><br>-... | <b>Global motor skills:</b><br>-S.I. of group 1 compared to group 2 and 3.<br><ul style="list-style-type: none"><li>S.I. of group 1 compared to group 3 for the bilateral coordination component.</li><li>S.I. of group 1 compared to group 2 for the balance component.</li></ul><br><b>Visual perception:</b><br>-S.I. of group 1 compared to group 2 for the SCSIT-design copying component.<br><br><b>Motor planning:</b><br>-S.I. of group 2 compared to groups 1 and 3.<br><br><b>Other variables:</b><br>No S.D. between the 3 groups. | <b>64% P</b><br>3-5-6-9 |

Supplementary Table ST4  
*Data extraction of sensorimotor approaches' studies*

| Design                                           | Objective                                                                                                                    | Sample                                                                                                                                                                                                                   | Intervention                                                                                                                                                                                                                                                                                                               | Outcomes                                                                                                                                                                                                                                                                                                                                                                                                        | Results                                                                                                                                                                                                                                                                                                                                                                                                                    | Qu                                                                                                        |
|--------------------------------------------------|------------------------------------------------------------------------------------------------------------------------------|--------------------------------------------------------------------------------------------------------------------------------------------------------------------------------------------------------------------------|----------------------------------------------------------------------------------------------------------------------------------------------------------------------------------------------------------------------------------------------------------------------------------------------------------------------------|-----------------------------------------------------------------------------------------------------------------------------------------------------------------------------------------------------------------------------------------------------------------------------------------------------------------------------------------------------------------------------------------------------------------|----------------------------------------------------------------------------------------------------------------------------------------------------------------------------------------------------------------------------------------------------------------------------------------------------------------------------------------------------------------------------------------------------------------------------|-----------------------------------------------------------------------------------------------------------|
| Experimental<br><br>Randomized<br>clinical trial | Impact of sensory integration therapy on academic skills, fine motor skills, global motor skills, self-esteem and behaviors. | N = 29 (sex not specified)<br><br><b>Age:</b> 5 to 9 yo<br><br><b>Diagnosis:</b> Sensory disorders and motor difficulties<br><br>n <sub>sensory integration therapy group</sub> = 14<br>n <sub>tutoring group</sub> = 15 | <b>Sensory integration group:</b><br>-Sensory integration therapy<br>-Implemented by 2 occupational therapists<br>-75 to 80 individual sessions<br>-50 min., 2 times per w.<br><br><b>Tutoring group:</b><br>-In a calm classroom<br>-Implemented by teachers<br>-75 to 80 individual sessions<br>-50 min., 2 times per w. | Woodcock-Johnson Psychoeducational Test Battery: -Academic skills<br><br>VMI, SCSIT (Design Copying and Motor Accuracy Test-Revised) and Handwriting Scale :<br>-Visual-motor skills<br><br>BOT-2 and SCSIT (Motor Accuracy Test-Revised):<br>-Fine motor skills<br><br>BOT-2 and Clinical Observations of Motor and Postural Skills:<br>-Global motor skills<br><br>Test of ocular pursuit:<br>-Ocular control | <b>All variables:</b><br>-6 months' posttest: No S.D. between groups, except for behaviors (Tutoring>sensory integration therapy*)<br><br>-12 months' posttest: No S.D. between the groups.<br><br>===== outcomes cont'd =====<br><br>The Pictorial Scale of Perceived Competence and Social Acceptance for Young Children:<br>-Self-esteem<br><br>The Abbreviated Symptom Questionnaire :<br>-Hyperactivity<br>-Behaviors | <b>64% P</b><br>2-5-6-9<br><br>===== outcom<br>=====<br><br>Miller Assess: Prescho (Behavi Observ: Forms) |

Supplementary Table ST4  
*Data extraction of sensorimotor approaches' studies*

| Design                                       | Objective                                                                                           | Sample                                                                                                                                            | Intervention                                                                                                                                                                                              | Outcomes                                                                                                                                                                                                                                                                                                                        | Results                                                                  | Qu                       |
|----------------------------------------------|-----------------------------------------------------------------------------------------------------|---------------------------------------------------------------------------------------------------------------------------------------------------|-----------------------------------------------------------------------------------------------------------------------------------------------------------------------------------------------------------|---------------------------------------------------------------------------------------------------------------------------------------------------------------------------------------------------------------------------------------------------------------------------------------------------------------------------------|--------------------------------------------------------------------------|--------------------------|
| Experimental<br>Randomized<br>clinical trial | Impact of sensory integration therapy on perceptual processing dysfunction and academic performance | N = 87 (66 males)<br>Age: 6 to 11 yo<br><br><b>Diagnosis:</b><br>Learning disability, sensory disorders<br><br>n exp. group=46<br>n ctrl group=41 | <b>Experimental group:</b><br>-Sensory integration therapy<br>-Implemented by an occupational therapist<br>-45 min., 2 or 3 times per w.<br>-Duration: 9 months (66 sessions)<br><br><b>Control group</b> | <b>Perceptual processing dysfunction:</b><br>Target Test:<br>-Visual tracking<br>-Attention<br>-Immediate memory<br><br>Underlining Test:<br>-Rapid visual perceptual analysis<br><br><b>Academic performance:</b><br>Gates-MacGinitie:<br>-Reading comprehension<br><br>WRAT:<br>-Spelling<br>-Reading-Decoding<br>-Arithmetic | <b>All variables:</b><br>No S.D. between experimental and control group. | <b>54% P</b><br>1-3-5-6- |

Supplementary Table ST4  
*Data extraction of sensorimotor approaches' studies*

| Design                                           | Objective                                                                                                                                       | Sample                                                                                                                                                                                                                           | Intervention                                                                                                                                                                                 | Outcomes                                                                                                                                                                                                                                                                                                                                                                                   | Results                                                                                                                                                                                       | Qu                       |
|--------------------------------------------------|-------------------------------------------------------------------------------------------------------------------------------------------------|----------------------------------------------------------------------------------------------------------------------------------------------------------------------------------------------------------------------------------|----------------------------------------------------------------------------------------------------------------------------------------------------------------------------------------------|--------------------------------------------------------------------------------------------------------------------------------------------------------------------------------------------------------------------------------------------------------------------------------------------------------------------------------------------------------------------------------------------|-----------------------------------------------------------------------------------------------------------------------------------------------------------------------------------------------|--------------------------|
| Experimental<br><br>Randomized<br>clinical trial | Impact of sensory integration therapy on vocabulary, reading, language, handwriting, motor skills, sensory integration and classroom behaviors. | N = 74 (sex not specified)<br><br><b>Age:</b> 5 first elementary schooly. (≈until 11 yo)<br><br><b>Diagnosis:</b> ADD, learning disability, sensory disorders<br><br>n <sub>exp.group</sub> = 39<br>n <sub>ctrl.group</sub> = 35 | <b>Experimental group:</b><br>-Ayres's sensory integration therapy (activities individualized for each child)<br>-13 sessions<br>-1h per w.<br><br><b>Control group:</b><br>-No intervention | Peabody Picture Vocabulary Test:<br>-Vocabulary<br><br>Burt Word Reading Test and Neale Analysis of Reading ability:<br>-Reading<br><br>Banks on Language Screening Test<br>-Language<br><br>Local test adapted by the author:<br>-Writing<br><br>BOT-2 (short form):<br>-Motor skills<br><br>SCSIT:<br>-Sensory Integration<br><br>Conner's Teacher Questionnaire:<br>-Classroom behavior | <b>All variables:</b><br><br>No S.D. between the experimental and control groups, except for the Visual Matching, a subtest of the Banks on Language Screening Test (Exp.group > Ctrl.group)* | <b>45% P</b><br>2-3-5-6- |

## Supplementary Table ST4

### *Data extraction of sensorimotor approaches' studies*

*Notes.* S.D. = significant difference; S.I. = significant improvement; exp. = experimental; ctrl. = control; ASD = autism spectrum disorder; ADHD = attention deficit disorder with hyperactivity; ADD = attention deficit disorder; N = number of participants; WVC = weighted vest condition; UVC = unweighted vest condition; NVC = no vest condition; TBC = therapy ball condition; ACC = air cushion condition; SCC = standard chair condition; AEC = aerobic exercise condition; CPT-2 = Conners' Continuous Performance Test-II; PDMS-2 = Peabody Developmental Motor Scales-Second Edition; VMI = Developmental Test of Visual-Motor Integration; PLS-3 = Preschool Language Scale-3; ETCH = Evaluation Tool of Children's Handwriting; ADHDT = Attention-Deficit/Hyperactivity Disorder Test; BRIEF = Behavior Rating Inventory of Executive Function; BOT-2 = Bruininks-Oseretsky Test of Motor Proficiency, Second Edition; SCSIT = Southern California Sensory Integration Tests WRAT = Wide Range Achievement Test; WISC-R = Wechsler Intelligence Scale for Children; TOLD = Test of Language Development - Primary;

\* = $p < 0,05$  ; \*\*= $p < 0,01$  ; \*\*\*= $p < 0,01$

\* Criteria of the French version of the Letts and al. (2007) critical review form for quantitative studies  
Also, the French-Canadian version of the PEDro scale: 1. Clear study purpose; 2. Relevant background literature reviewed; 3. Study design; 4. Description of the sampling method; 5. Justification of the sample size; 6. Reliability of the outcome measures; 7. Validity of the outcomes measures; 8. Description of the intervention; 9. Contamination avoided; 10. Cointerventions avoided. 11. Results reported in term of statistical significance; 12. Appropriate statistical analysis methods; 13. Clinical importance reported; 14. Appropriate analysis methods of statistical importance; 14. Drop-outs reported; 15. Appropriate conclusions; 17. Implications for the practice mentioned.

\*Criteria of the French-Canadian version of the PEDro scale (Brosseau and al., 2015): 1. Eligibility criteria specified; 2. Subjects randomly allocated to groups; 3. Allocation concealed; 4. Similar groups at baseline regarding the most important prognostic indicators; 5. Blinding of all subjects; 6. Blinding of all therapist who administered the therapy; 7. Blinding of all assessors who measured at least one outcome; 8. Measures of at least one key outcome obtained from more than 85% of the subjects initially allocated to groups; 9. All subjects for whom outcome measures were available received the treatment or control condition as allocated or data for at least one key outcome was analysed by "intention to treat"; 10. Results of between-group statistical comparisons reported for at least one key outcome; 11. The study provides both point measures and measures of variability for at least one key outcome.

Supplementary Table ST4

*Data extraction of sensorimotor approaches' studies*

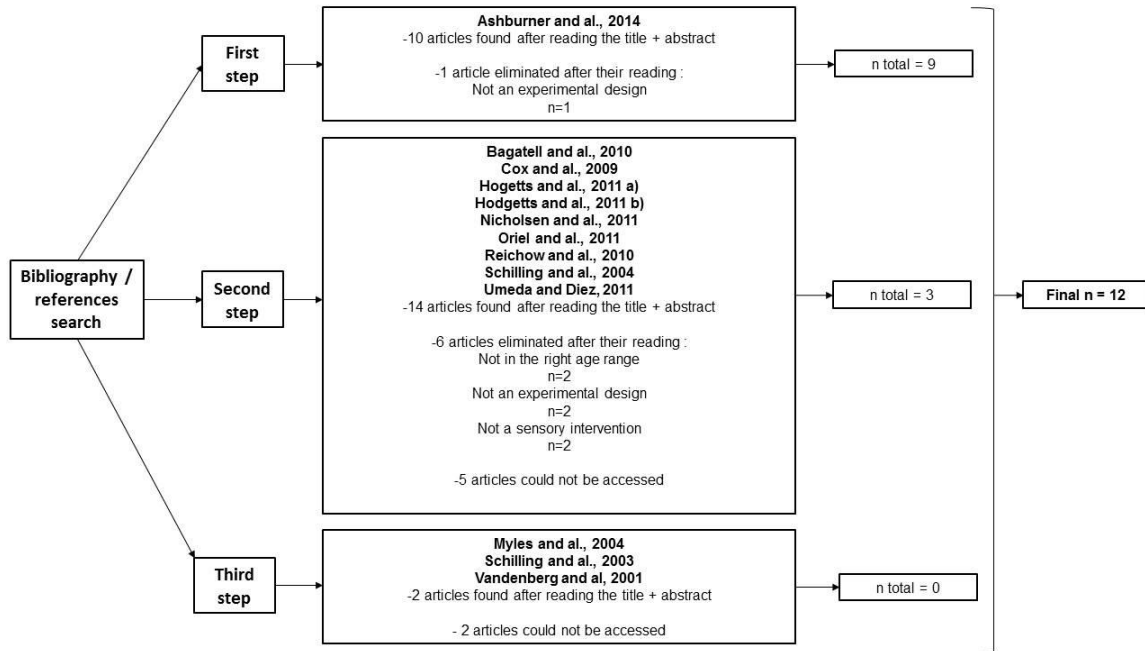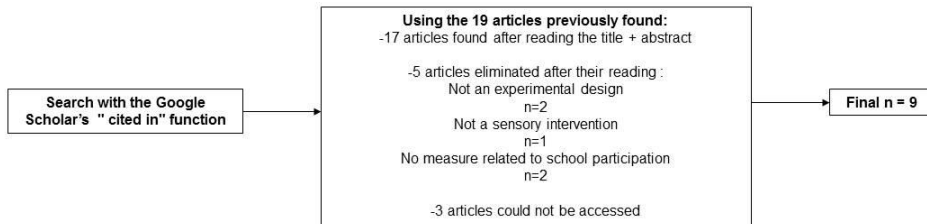

Supplement: ST1-5_and_SF_1-2.pdf [file ST1-5_and_SF_1-2.pdf]
